# Supplementary material for: Vitamin D and C-Reactive Protein: A Mendelian Randomization Study
Source: PubMed Central journal article supplement (PMC4492676; doi:10.1371/journal.pone.0131740), 2015-07-06
Supplement: pone.0131740.s001.pdf [file pone.0131740.s001.pdf]

**S1 Figure. Quartiles of the 25-hydroxyvitamin D score in relation to serum 25-hydroxyvitamin D**

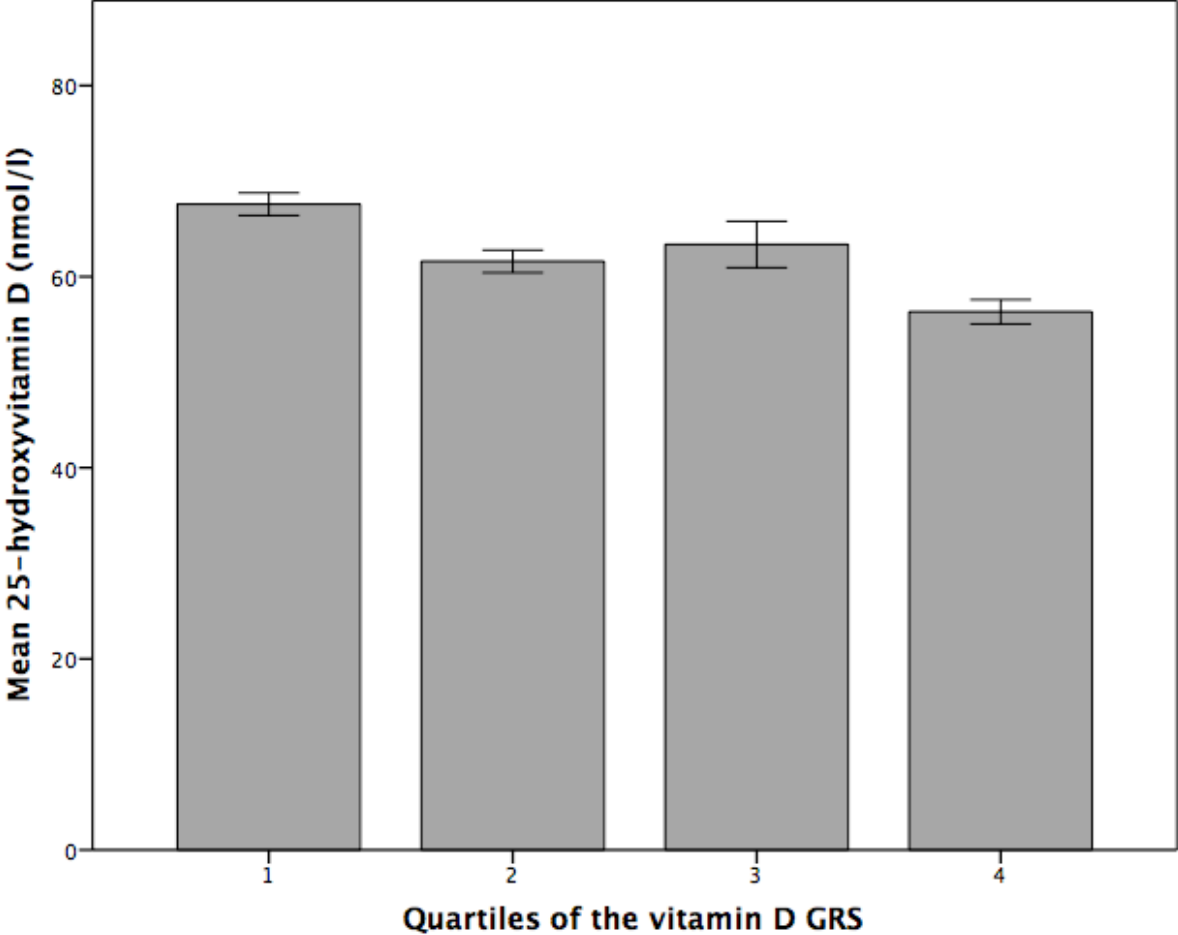

Error bars represent 95% confidence intervals

P for trend =  $1.07 \times 10^{-35}$
