# Supplementary material for: Vitamin D and C-Reactive Protein: A Mendelian Randomization Study
Source: PubMed Central journal article supplement (PMC4492676; doi:10.1371/journal.pone.0131740), 2015-07-06
Supplement: pone.0131740.s003.pdf [file pone.0131740.s003.pdf]

**S1 Table. Overview of missing data**

| <b>Variable</b>         | <b>Percentage missing</b> | <b>Imputed yes/no</b> |
|-------------------------|---------------------------|-----------------------|
| Cohort                  | 0                         | No                    |
| Age                     | 0                         | No                    |
| Sex                     | 0                         | No                    |
| 25-hydroxyvitamin D     | 0                         | No                    |
| lnCRP                   | 0                         | No                    |
| Body Mass Index         | 1.4                       | Yes                   |
| Systolic blood pressure | 0.6                       | Yes                   |
| TC/HDL                  | 1.4                       | Yes                   |
| Diabetes Mellitus       | 0.4                       | Yes                   |
| eGFR                    | 1.6                       | Yes                   |
| Season                  | 0.3                       | Yes                   |
| Alcohol intake          | 6.7                       | Yes                   |
| Smoking                 | 1.0                       | Yes                   |
| Level of education      | 0.9                       | Yes                   |

Abbreviations: lnCRP = natural log-transformed C-reactive protein; TC/HDL ratio = total cholesterol/high density lipoprotein ratio; eGFR = estimated glomerular filtration rate
