# Supplementary material for: Vitamin D and C-Reactive Protein: A Mendelian Randomization Study
Source: PubMed Central journal article supplement (PMC4492676; doi:10.1371/journal.pone.0131740), 2015-07-06
Supplement: pone.0131740.s004.pdf [file pone.0131740.s004.pdf]

**S2 Table. Comparison of the population under study with the population not under study**

|                                          | Population for analysis | Population not eligible for analysis | p-value |
|------------------------------------------|-------------------------|--------------------------------------|---------|
| <b>Number</b>                            | 9,649                   | 4,977                                |         |
| <b>Age, years</b>                        | 64.9 (9.8)              | 73.5 (10.8)                          | <0.001  |
| <b>Sex, male</b>                         | 4,167 (43.2)            | 1,860 (37.4)                         | <0.001  |
| <b>Body mass index, kg/m<sup>2</sup></b> | 27 (5)                  | 27 (4)                               | 0.927   |
| <b>Systolic blood pressure, mmHg</b>     | 140 (21)                | 142 (23)                             | 0.001   |
| <b>eGFR, ml/min/1.73m<sup>2</sup></b>    | 81.2 (17.9)             | 80.4 (18.6)                          | 0.392   |
| <b>TC/HDL ratio</b>                      | 4.4 (1.4)               | 4.4 (1.3)                            | 0.841   |
| <b>Alcohol Intake, gram/day</b>          | 12.1 (0.7-15.0)         | 2.9 (0.0-15.0)                       | <0.001  |
| <b>Smoking</b>                           |                         |                                      | <0.001  |
| <b>Never</b>                             | 2,926 (30.3)            | 641 (12.9)                           |         |
| <b>Former</b>                            | 4,475 (46.4)            | 796 (16.0)                           |         |
| <b>Current</b>                           | 2,129 (22.5)            | 484 (9.7)                            |         |
| <b>Prevalent DM</b>                      | 1,121 (11.6)            | 695 (14.0)                           | <0.001  |
| <b>Level of education</b>                |                         |                                      | <0.001  |
| <b>ISCED 0</b>                           | 1,203 (12.5)            | 1,458 (29.9)                         |         |
| <b>ISCED 1</b>                           | 3,872 (40.1)            | 1,841 (37.0)                         |         |
| <b>ISCED 2</b>                           | 2,777 (28.8)            | 1,064 (21.4)                         |         |
| <b>ISCED 3</b>                           | 1,714 (17.8)            | 402 (8.1)                            |         |

Numbers show mean (SD) for age, body mass index, systolic blood pressure, eGFR and TC/HDL ratio, median (IQR) for alcohol intake, and frequency (%) for sex, smoking, prevalent DM and level of education

Abbreviations: eGFR = estimated glomerular filtration rate; TC/HDL ratio = total cholesterol to high-density lipoprotein ratio; DM = diabetes mellitus; ISCED = International Standard Classification of Education
