# Supplementary material for: Vitamin D and C-Reactive Protein: A Mendelian Randomization Study
Source: PubMed Central journal article supplement (PMC4492676; doi:10.1371/journal.pone.0131740), 2015-07-06
Supplement: pone.0131740.s005.pdf [file pone.0131740.s005.pdf]

**S3 Table. P-values for the association between serum 25-hydroxyvitamin D and C-reactive protein in a quadratic model**

|                       | <b>N</b> | <b>Model 1</b>            | <b>Model 2</b>            |
|-----------------------|----------|---------------------------|---------------------------|
| <b>Squared 25OHD*</b> | 9,649    | $p = 8.55 \times 10^{-9}$ | $p = 3.21 \times 10^{-6}$ |

Model 1: adjusted for age, sex and cohort

Model 2: adjusted for age, sex, cohort, body mass index, total cholesterol to high-density lipoprotein ratio, systolic blood pressure, prevalent diabetes mellitus, estimated glomerular filtration rate, smoking, alcohol intake, season and level of education

\*25OHD denotes 25-hydroxyvitamin D
