# Supplementary material for: Vitamin D and C-Reactive Protein: A Mendelian Randomization Study
Source: PubMed Central journal article supplement (PMC4492676; doi:10.1371/journal.pone.0131740), 2015-07-06
Supplement: pone.0131740.s006.pdf [file pone.0131740.s006.pdf]

**S4 Table. P-values for the association between serum 25-hydroxyvitamin D and C-reactive protein in a quadratic model in subjects with data on osteoporosis available**

|                       | <b>N</b> | <b>Model 1</b> | <b>Model 2</b> | <b>Model 3</b> |
|-----------------------|----------|----------------|----------------|----------------|
| <b>Squared 25OHD*</b> | 2,746    | p = 0.153      | p = 0.333      | p = 0.336      |

Model 1: adjusted for age and sex

Model 2: adjusted for age, sex, body mass index, total cholesterol to high-density lipoprotein ratio, systolic blood pressure, prevalent diabetes mellitus, estimated glomerular filtration rate, smoking, alcohol intake, season and level of education

Model 3: additionally adjusted for osteoporosis

\*25OHD denotes 25-hydroxyvitamin D
