# Supplementary material for: Vitamin D and C-Reactive Protein: A Mendelian Randomization Study
Source: PubMed Central journal article supplement (PMC4492676; doi:10.1371/journal.pone.0131740), 2015-07-06
Supplement: pone.0131740.s007.pdf [file pone.0131740.s007.pdf]

**S5 Table. Individual associations of vitamin D related SNPs with lnCRP**

| <b>SNP</b> | <b>Beta</b> | <b>p-value</b> |
|------------|-------------|----------------|
| rs12785878 | -0.003      | 0.897          |
| rs10741657 | -0.007      | 0.659          |
| rs2282679  | -0.036      | 0.027          |
| rs6013897  | -0.012      | 0.493          |

After Bonferroni correction the threshold for significance lies at  $p = 0.0125$
